# Supplementary material for: Deep tissue optical imaging of upconverting nanoparticles enabled by exploiting higher intrinsic quantum yield through use of millisecond single pulse excitation with high peak power
Source: Royal Society of Chemistry journal article supplement (doi:10.1039/c3nr01917a), 2013-01-01
Supplement: c3nr01917a.pdf [file c3nr01917a.pdf]

## Electronic Supplementary Information (ESI) for:

### Deep tissue optical imaging of upconverting nanoparticles enabled by exploiting higher intrinsic quantum yield through using millisecond single pulse excitation with high peak power

Haichun Liu,<sup>a,\*</sup> Can T. Xu,<sup>a</sup> Gökhan Dumlupinar,<sup>a</sup> Ole B. Jensen,<sup>b</sup> Peter E. Andersen,<sup>b</sup> and Stefan Andersson-Engels<sup>a</sup>

<sup>a</sup> *Department of Physics, Lund University, P.O. Box 118, S-221 00 Lund, Sweden.*  
[haichun.liu@fysik.lth.se](mailto:haichun.liu@fysik.lth.se)

<sup>b</sup> *Department of Photonics Engineering, Technical University of Denmark, Frederiksborgvej 399, DK-4000 Roskilde, Denmark.*

#### Content:

1. TEM image of the core NaYF<sub>4</sub>:Yb<sup>3+</sup>,Tm<sup>3+</sup> UCNPs
2. The calculation of ion concentrations
3. Estimated number of ions in a single nanoparticle
4. The selection of the ETU rates
5. Decay profiles of NIR UC emission from Tm<sup>3+</sup> ions and the emission at 1035 nm from Yb<sup>3+</sup> ions under a square-wave 975 nm excitation
6. Simulated cumulative QY at the average power density of 1 W/cm<sup>2</sup>
7. The influence of ETU rates on the simulated signal gain
8. The calculation of maximum permissible power-density for exposure to human skin

## 1. TEM image of the core NaYF<sub>4</sub>:Yb<sup>3+</sup>,Tm<sup>3+</sup> UCNPs

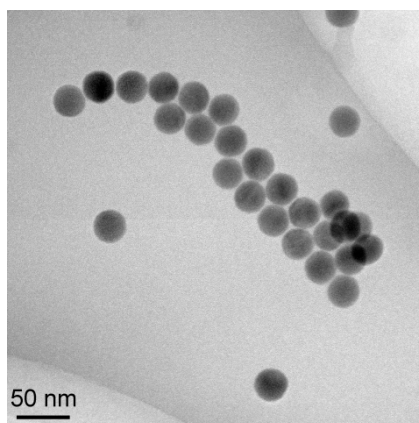

Figure S1. TEM image of core NaYF<sub>4</sub>:Yb<sup>3+</sup>,Tm<sup>3+</sup> nanoparticles. The mean diameter was determined to be approximately 32 nm.

## 2. The calculation of ion concentrations

The core-shell UCNPs used in this study are composed of two portions, *i.e.*, the optical active core NaY<sub>1-x-y</sub>Yb<sub>x</sub>Tm<sub>y</sub>F<sub>4</sub> (*x* and *y* denoting the molar concentrations in rare earth elements, respectively) and the shielding layer NaYF<sub>4</sub>. The cores have an average diameter of  $D_1=32$  nm, and the core-shell particles have an average diameter of  $D_2 = 42$  nm. In the rate equation model,  $N_0$  and  $N_{Yb0}$  denote the number densities of Tm<sup>3+</sup> and Yb<sup>3+</sup> ions in the core portion, respectively.

The overall molar ratio between the three rare earth elements in the core-shell UCNPs was determined to be Y:Yb:Tm = 94.858%:5.100%:0.042% by ICP-OES analysis on a PerkinElmer Optima 8300. The molar weight of NaY<sub>1-x-y</sub>Yb<sub>x</sub>Tm<sub>y</sub>F<sub>4</sub> is thus obtained

$$\begin{aligned} Mr_1 &= 22.99 + 88.91 \cdot (1 - x - y) + 173.04 \cdot x + 168.93 \cdot y + 19.00 \times 4 \\ &= 187.9 + 84.13 \cdot x + 80.02 \cdot y \text{ g/mol,} \end{aligned}$$

while the molar weight of NaYF<sub>4</sub> is

$$Mr_2 = 22.99 + 88.91 + 19.00 \times 4 = 187.9 \text{ g/mol.}$$

The density of NaYF<sub>4</sub> crystal was determined to be  $\rho = 4.2$  g/cm<sup>3</sup> by X-ray energy dispersive spectroscopy (XEDS) analysis. The mass of the core portion in a single core-shell UCNP can be calculated by

$$m_{\text{core}} = V_{\text{core}} \cdot \rho = \frac{4}{3}\pi \left(\frac{D_1}{2}\right)^3 \cdot \rho = 2.3 \times 10^{-17} \text{ g,}$$

while the mass of the shell portion can be calculated by

$$m_{\text{shell}} = V_{\text{shell}} \cdot \rho = \left[ \frac{4}{3}\pi \left(\frac{D_2}{2}\right)^3 - \frac{4}{3}\pi \left(\frac{D_1}{2}\right)^3 \right] \cdot \rho = 2.9 \times 10^{-17} \text{ g.}$$

The overall molar ratio between the rare earth elements can be calculated by

$$\text{Y:Yb:Tm} = \left[ \frac{m_{\text{core}}}{Mr_1} \cdot (1 - x - y) + \frac{m_{\text{shell}}}{Mr_2} \right] : \frac{m_{\text{core}}}{Mr_1} \cdot x : \frac{m_{\text{core}}}{Mr_1} \cdot y$$

$$= 94.858\%: 5.100\%: 0.042\%$$

$x$  and  $y$  are thus determined to be

$$x = 11.9\%,$$

and

$$y = 0.098\%$$

The concentration of  $\text{Yb}^{3+}$  ions is obtained by

$$N_{\text{Yb0}} = \frac{\rho \cdot 1}{Mr_1} \cdot x \cdot N_A = 1.52 \times 10^{21} \text{cm}^{-3}$$

involving  $N_A$  the Avogadro constant. Similarly, the concentration of  $\text{Tm}^{3+}$  ions is obtained by

$$N_0 = \frac{\rho \cdot 1}{Mr_1} \cdot y \cdot N_A = 1.25 \times 10^{19} \text{cm}^{-3}$$

### 3. Estimated number of ions in a single nanoparticle

In a single nanoparticle, the numbers of ions can be obtained by

$$n_{\text{Yb}} = N_{\text{Yb0}} \cdot V_{\text{core}} = 26080$$

and

$$n_{\text{Tm}} = N_0 \cdot V_{\text{core}} = 215$$

for  $\text{Yb}^{3+}$  and  $\text{Tm}^{3+}$  ions, respectively.

### 4. The selection of the ETU rates

#### a. The selection of $C_0$ and $C_1$

The power density dependent steady-state quantum yield of the used core-shell UCNPs have been measured and reported recently in our previous work [Liu *et al.*, *Nanoscale*, 2013, **5**, 4770-4775]. In this study, the ETU rates  $C_0$  and  $C_1$  were selected on the principle of giving the best fitting between the simulated and experimental results, which ends up with

$$C_0 = 1.6 \times 10^{-18} \text{cm}^3/\text{s},$$

and

$$C_1 = 6.2 \times 10^{-16} \text{cm}^3/\text{s}.$$

Since  $\text{NaYF}_4$  is poorly characterized in bulk form, we compared such values with those reported in Ref. 28 for  $\text{LiYF}_4$  crystal, which has similar phonon energies to  $\text{NaYF}_4$ . The selected value for  $C_0$  here is several times smaller than that for sample no. 5 ( $C_0 = 9.1 \times 10^{-18} \text{cm}^3/\text{s}$ ) in Ref. 28 which has the most similar molar concentrations with the UCNPs investigated. This is reasonable considering the  $\sim 10$  times less doping level of  $\text{Tm}^{3+}$  ions in this study, as  $C_0$  decreases with the decrease of the molar concentration of  $\text{Tm}^{3+}$  ions, referring to the energy-transfer parameters for samples no. 2 and no. 4 in TABLE III reported in Ref. 28. The value for  $C_1$  is on the same order of that reported in Ref. 28 for sample no. 5, exhibiting its reasonability.

b. The selection of  $C_2$

The energy gap between states  $^3H_5$  ( $Tm^{3+}$ ) and  $^3H_6$  ( $Tm^{3+}$ ) ( $\sim 8500\text{ cm}^{-1}$ ) is similar to that between  $^1G_4$  and  $^3H_4$  ( $\sim 8620\text{ cm}^{-1}$ )<sup>27</sup>. Thus, the energy mismatches of ETU0 and ETU1 are very similar. Using the energy-gap law formula [Diening *et al.*, J. Appl. Phys. 1998, **84**, 5900-5904],  $C_2$  was estimated to be similar to  $C_0$ . In this study, we take the same value for  $C_2$  with  $C_0$ .

5. Decay profiles of NIR UC emission from  $Tm^{3+}$  ions and the emission at 1035 nm from  $Yb^{3+}$  ions under 975 nm excitation

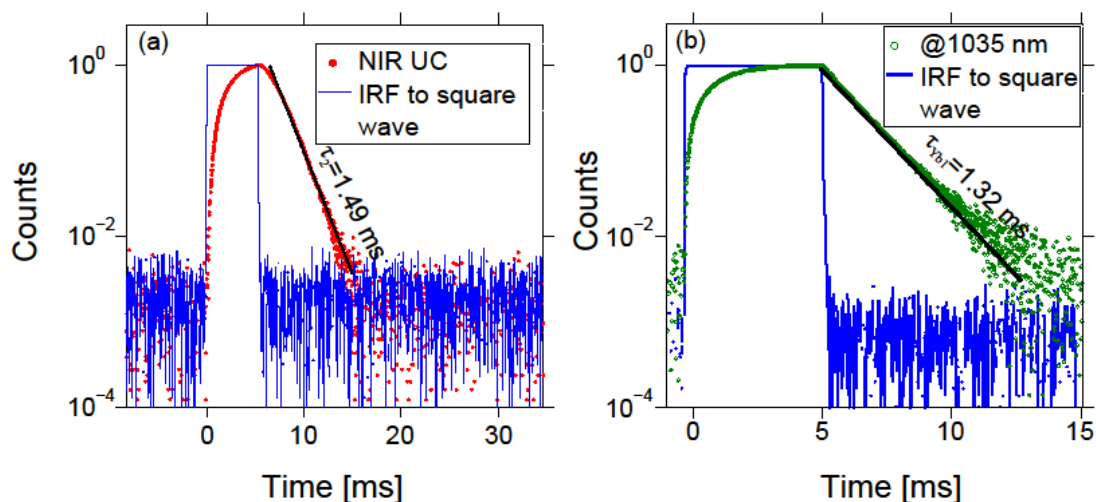

Figure S2. Decay profile of (a) the NIR UC emission at 800 nm from  $Tm^{3+}$  ions and (b) the emission at 1035 nm from  $Yb^{3+}$  ions under a square-wave excitation at 975 nm.

6. Simulated cumulative QY at the average power density of  $1\text{ W/cm}^2$

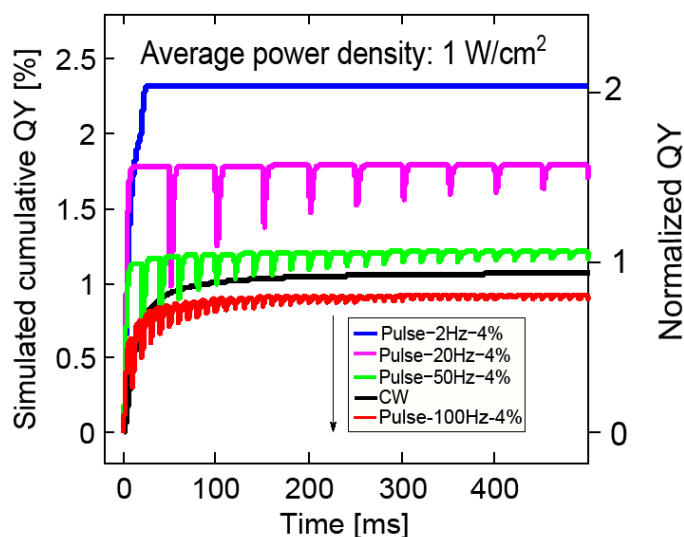

Figure S3. The temporally cumulative QY of NIR UC emission under CW excitation and under pulsed excitation with a fixed duty cycle of 4% and with various repetition rates. All the excitation approaches have the same average power density of  $1\text{ W/cm}^2$

## 7. The influence of ETU rates on the simulated signal gain

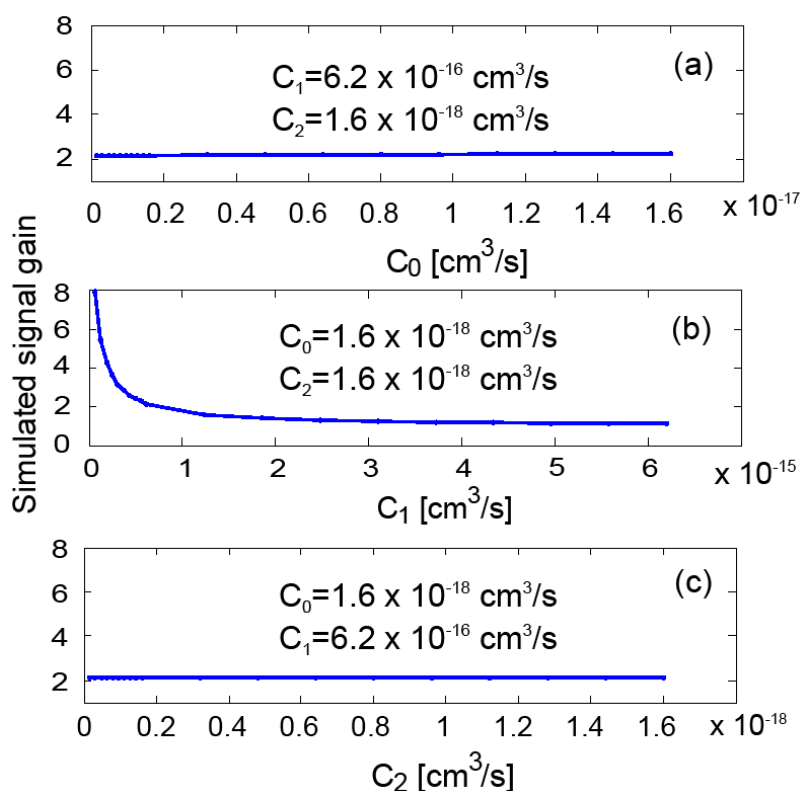

Figure S4. The influence of ETU rates (a)  $C_0$ , (b)  $C_1$  and (c)  $C_2$  on the simulated signal gain. The average power density was set to  $1 \text{ W/cm}^2$ , and the pulsed excitation has a 2 Hz repetition rate and 4% duty cycle in all simulations. Other parameter values were kept unchanged as in Table 1.

## 8. The calculation of maximum permissible power-density for exposure to human skin

### a. For CW excitation

The Maximum permissible exposure (MPE) for skin exposure to a CW laser beam is given by

$$\text{MPE}_{\text{CW}} = 0.2C_A \text{ W} \cdot \text{cm}^{-2} \quad (1)$$

where  $C_A$  is a wavelength dependent parameter,

$$C_A = 10^{2(\lambda - 0.700)} \quad (2)$$

with  $\lambda$  [ $\mu\text{m}$ ] the wavelength. For the wavelength of 975 nm,

$$C_A = 3.548 \quad (3)$$

and

$$\text{MPE}_{\text{CW}} = 709.6 \text{ mW} \cdot \text{cm}^{-2} \quad (4)$$

### b. For repetitive pulse excitation

For repetitive-pulse lasers, two rules apply to determine the MPEs for skin exposure.

### Rule 1. Single-pulse limit.

Exposure of the skin shall not exceed the MPE based upon a single-pulse exposure.

### Rule 2. Average-power limit

The average irradiance of the pulse train shall not exceed the MPE applicable for the total pulse train, duration  $T$ .

The MPE found using Rule 1 for a 975 nm laser where  $T = 10$  s, pulse width  $t = 20$  ms and  $F = 2$  Hz is:

$$\begin{aligned} \text{MPE}_{\text{sp}} &= 1.1C_A t^{0.25} \text{ J} \cdot \text{cm}^{-2} \\ &= 1.1 \times 3.548 \times 0.02^{0.25} \text{ J} \cdot \text{cm}^{-2} \\ &= 1.47 \text{ J} \cdot \text{cm}^{-2} \end{aligned} \quad (5)$$

This MPE in terms of average power for Rule 1 is:

$$\text{MPE: } E = \text{MPE}_{\text{sp}} \times F = 2.9 \text{ W} \cdot \text{cm}^{-2} \quad (6)$$

The MPE found using Rule 2 is:

$$\begin{aligned} \text{MPE: } H_{\text{group}} &= 1.1C_A t^{0.25} \text{ J} \cdot \text{cm}^{-2} \\ &= 1.1 \times 3.548 \times 10^{0.25} \text{ J} \cdot \text{cm}^{-2} \\ &= 6.94 \text{ J} \cdot \text{cm}^{-2} \end{aligned} \quad (7)$$

In terms of average irradiance, the MPE is

$$\text{MPE: } E = \frac{\text{MPE: } H_{\text{group}}}{10 \text{ s}} = 694 \text{ mW} \cdot \text{cm}^{-2} \quad (8)$$

Resultant MPE:

The MPE found using Rule 2 is the correct MPE to apply, since it is the smallest. The corresponding peak power-density in the pulse duration is

$$\rho = 694 \text{ mW} \cdot \text{cm}^{-2} \times \frac{1}{20 \text{ ms}} = 17.4 \text{ W} \cdot \text{cm}^{-2} \quad (9)$$

### c. For single pulse excitation

The MPE for the single pulse excitation can be calculated by

$$\text{MPE}_{\text{sp}} = \frac{1.1C_A t^{0.25}}{t} \text{ W} \cdot \text{cm}^{-2} \quad (10)$$

For a 50 ms single pulse,

$$\text{MPE}_{\text{sp}} = 36.9 \text{ W} \cdot \text{cm}^{-2} \quad (11)$$

**Supporting references:**

1. H. Liu, C. T. Xu, D. Lindgren, H. Xie, D. Thomas, C. Gundlach and S. Andersson-Engels, *Nanoscale*, 2013, **5**, 4770-4775.
2. A. Diening, P. E.-A. Möbert and G. Huber, *J. Appl. Phys.*, 1998, **84**, 5900-5904.
